# Supplementary material for: Mangosteen Pericarp Extract Supplementation Boosts Antioxidant Status via Rebuilding Gut Microbiota to Attenuate Motor Deficit in 6-OHDA-Induced Parkinson’s Disease
Source: MDPI journal article supplement (doi:10.3390/antiox11122396), 2022-12-02
Supplement: s1 [file s1]

## Supplementary Materials

**Table S1.** Primer sequences for rat antioxidant and mitochondrial mRNA

| Gene         | Forward                    | Reverse                      | Accession Number |
|--------------|----------------------------|------------------------------|------------------|
| <i>Actb</i>  | 5'- GCAGATGTGGATCAGCAAGC   | 5'- GGTGTAAAACGCAGCTCAGTAA   | NM_031144.3      |
| <i>Sod1</i>  | 5'- TCTAAGAAACATGGCGGTCC   | 5'- CAGTTAGCAGGCCAGCAGAT     | NM_017050.1      |
| <i>Sod2</i>  | 5'-CAATCTGAACGTCACCGAGGA   | 5'-AGCAGGCGGCAATCTGTAA       | NM_017051.2      |
| <i>Cat</i>   | 5'-TGTGGTTTTTCACCGACGAGAT  | 5'-GCTTGAAGGTGTGTGAGCCAT     | NM_012520.2      |
| <i>Gpx</i>   | 5'- CTCTCCGCGGTGGCACAGT    | 5'- CCACCACCGGGTCGGACATAC    | NM_030826.4      |
| <i>Nrf2</i>  | 5'- TCAATGACTCTGACTCCGGCA  | 5'- TCCTACAGTTCTGAGCGGCAA    | NM_001399173.1   |
| <i>Nd1</i>   | 5'- CAAAGGCCCCAACAACGAAG   | 5'- TGAGGTGGTTAGAGGGCGTA     | X07479.1         |
| <i>Atp6</i>  | 5'- CGAACCTGAGCCCTAATA     | 5'- GTAGCTCCTCCGATTAGA       | MW209726.1       |
| <i>Pgc1a</i> | 5'-GTGCAGCCAAGACTCTGTATGG  | 5'-GTCCAGGTCATTACATCAAGTTC   | NM_031347.1      |
| <i>Nrf1</i>  | 5'- GCTGTCCCACCTCGTGTCGTAT | 5'- GTTTGAGTCTAACCCATCTATCCG | NM_001100708.1   |
| <i>Tfam</i>  | 5'- CGCCTAAAGAAGAAAGCACA   | 5'- GCCCAACTTCAGCCATTT       | NM_031326.2      |

(A)

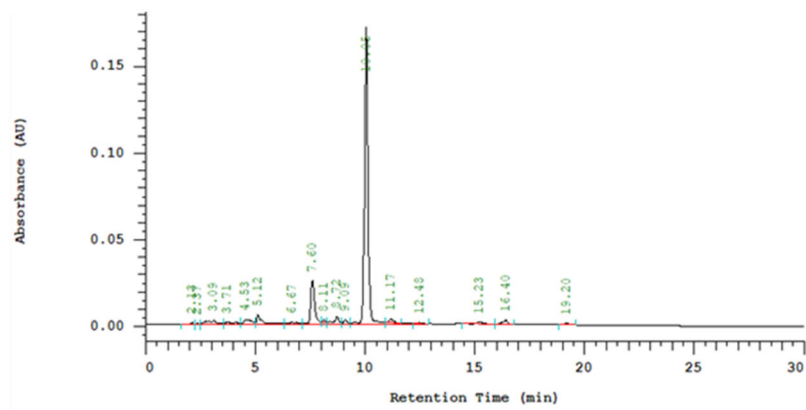

(B)

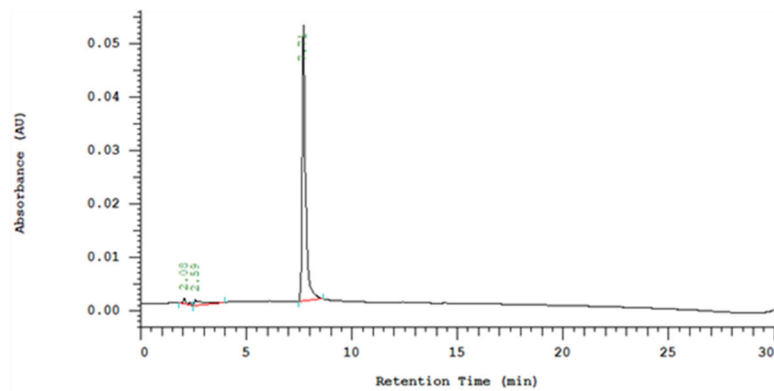

(C)

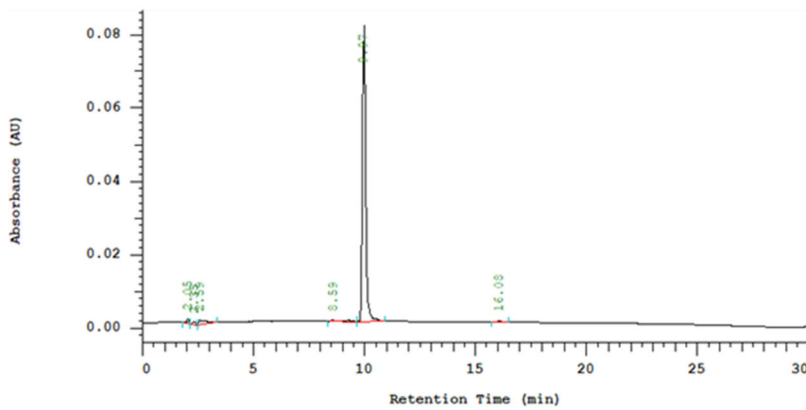

**Figure S1.** High-performance liquid chromatography (HPLC) elution profiles of (A) mangosteen pericarp extract (0.1 mg of mangosteen pericarp extract/mL), (B)  $\gamma$ -mangostin standard (25  $\mu$ g/mL), and (C)  $\alpha$ -mangostin standard (25  $\mu$ g/mL).

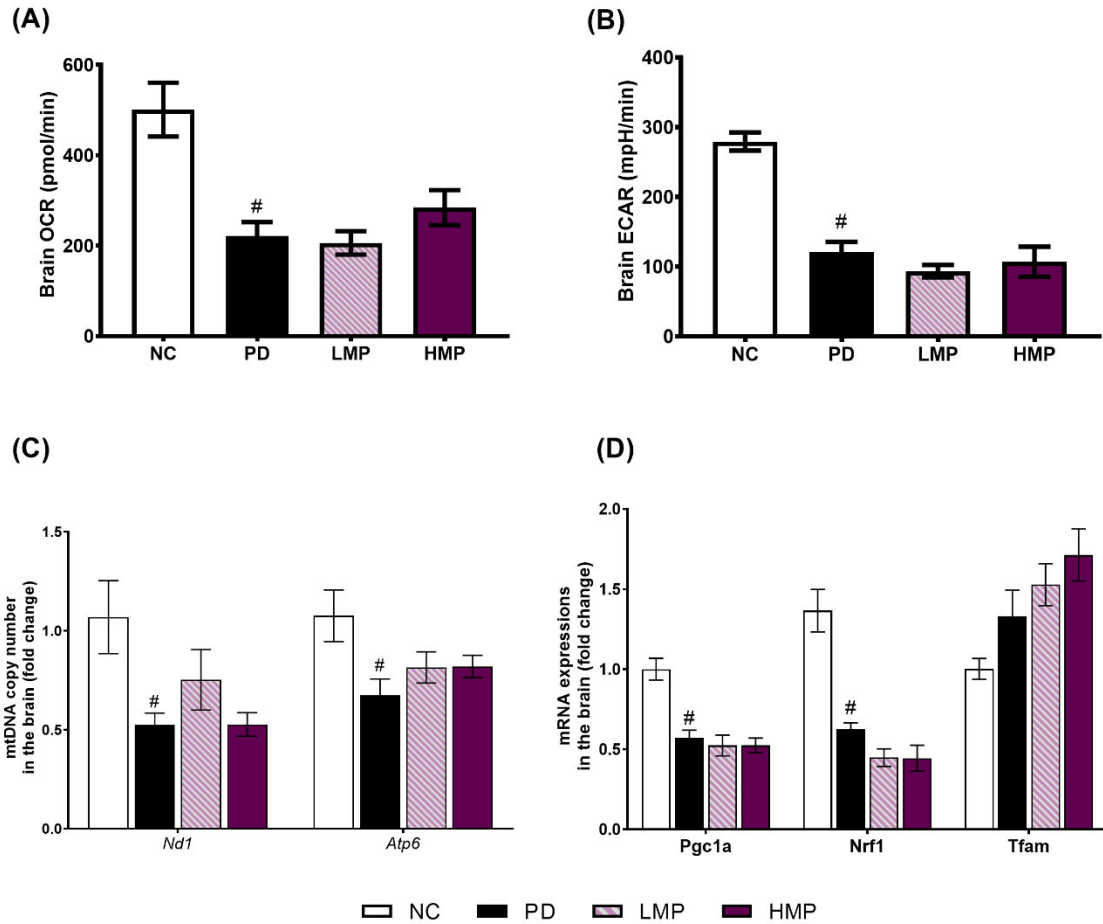

**Figure S2.** Comparison of mitochondrial function and mitochondria-related mRNA expressions in the brain between groups after 8-weeks supplementations. **(A)** The basal oxygen consumption rate (OCR) as used to evaluate mitochondrial respiration. **(B)** The basal extracellular acidification flux (ECAR) was used to evaluate the glycolysis rate. **(C)** mtDNA copy numbers (*Nd1* and *Atp6*). **(D)** Mitochondria biogenesis-related mRNA expression genes: PPARG coactivator 1 alpha (*Pgc1a*), nuclear respiratory factor 1 (*Nrf1*), mitochondrial transcription factor A (*Tfam*). Results are presented as the average  $\pm$  SEM with  $n = 5$  rats/group as analyzed by one-way ANOVA with Tukey's post hoc test. <sup>#</sup>  $p < 0.05$  in a comparison of the Parkinson's disease (PD) group with the normal control (NC) group. No significant differences found between PD group and low-dose mangosteen pericarp (LMP) or high-dose mangosteen pericarp (HMP) group.
